# Supplementary material for: Exploring the impact of curiosity and sport commitment on creativity among fitness coaches: the mediating role of knowledge-sharing and flow experience
Source: PeerJ journal article supplement (doi:10.7717/peerj.19684), 2025-07-15
Supplement: 2024929Code_Book.docx [file 2024929Code_Book.docx]

Code Book

Project title: Exploring the Impact of Curiosity and Sport Commitment on Creativity among Fitness Coaches: The Mediating Role of Knowledge-Sharing and Flow Experience

**Guidance – remove this box before submitting!**

Yellow callout boxes provide general notes. Please remove the yellow boxes before submitting. For full guidance see <https://peerj.com/about/author-instructions>

Blue highlighted example text should be replaced or removed with your own information.

| **DO**  –Use clear and grammatically correct English.  –Save as US Letter size format.  –Ensure line numbering is enabled.  –Align text LEFT.  –Ensure title, abstract, and author information matches what is entered online during submission. | **DO NOT**  –Embed ANY figures or tables in the text. Instead, upload a separate file for each on the file uploads page when submitting. Example – If you have 3 figures, then you will upload 3 figure files & be asked to add a figure title for each. See [https://peerj.com/about/author-instructions/#figures](https://peerj.com/about/author-instructions/" \l "figures) for figure formats. |
| --- | --- |

# Column 1: number of participants

# Column 2: JE1(Joyous Exploration1)

# Column 3: JE2(Joyous Exploration2)

# Column 4: JE3(Joyous Exploration3)

# Column 5: JE4(Joyous Exploration4)

# Column 6: JE5(Joyous Exploration5)

# Column 7: DS1(Deprivation Sensitivity1)

# Column 8: DS2(Deprivation Sensitivity2)

# Column 9: DS3(Deprivation Sensitivity3)

# Column 10: DS4(Deprivation Sensitivity4)

# Column 11: DS5(Deprivation Sensitivity5)

# Column 12: SC1(Social Curiosity1)

# Column 13: SC2(Social Curiosity2)

# Column 14: SC3(Social Curiosity3)

# Column 15: SC4(Social Curiosity4)

# Column 16: SC5(Social Curiosity5)

# Column 17: TS1(Thrill Seeking1)

# Column 18: TS2(Thrill Seeking2)

# Column 19: TS3(Thrill Seeking3)

# Column 20: TS4(Thrill Seeking4)

# Column 21: TS5(Thrill Seeking5)

# Column 22: EC1(Enthusiastic Commitment1)

# Column 23: EC2(Enthusiastic Commitment2)

# Column 24: EC3(Enthusiastic Commitment3)

# Column 25: EC4(Enthusiastic Commitment4)

# Column 26: EC5(Enthusiastic Commitment5)

# Column 27: EC6(Enthusiastic Commitment6)

# Column 28: CC1(Constrained Commitment1)

# Column 29: CC2(Constrained Commitment2)

# Column 30: CC3(Constrained Commitment3)

# Column 31: CC4(Constrained Commitment4)

# Column 32: CC5(Constrained Commitment5)

# Column 33: SPE1(Sport Enjoyment1)

# Column 34: SPE2(Sport Enjoyment2)

# Column 35: SPE3(Sport Enjoyment3)

# Column 36: SPE4(Sport Enjoyment4)

# Column 37: SPE5(Sport Enjoyment5)

# Column 38: KC1(Knowledge Collecting1)

# Column 39: KC2(Knowledge Collecting2)

# Column 40: KC3(Knowledge Collecting3)

# Column 41: KC4(Knowledge Collecting4)

# Column 42: KD1(Knowledge Donating1)

# Column 43: KD2(Knowledge Donating2)

# Column 44: KD3(Knowledge Donating3)

# Column 45: KD4(Knowledge Donating4)

# Column 46: UF1(Unambiguous Feedback1)

# Column 47: UF2(Unambiguous Feedback2)

# Column 48: UF3(Unambiguous Feedback3)

# Column 49: UF4(Unambiguous Feedback4)

# Column 50: CG1(Clear Goals1)

# Column 51: CG2(Clear Goals2)

# Column 52: CG3(Clear Goals3)

# Column 53: CG4(Clear Goals4)

# Column 54:COTAH1(Concentration on Task at Hand1)

# Column 55:COTAH2(Concentration on Task at Hand2)

# Column 56:COTAH3(Concentration on Task at Hand3)

# Column 57:COTAH4(Concentration on Task at Hand4)

# Column 58:TOT1(Transformation of Time1)

# Column 59:TOT2(Transformation of Time2)

# Column 60:TOT3(Transformation of Time3)

# Column 61:TOT4(Transformation of Time4)

# Column 62:AE1(Autotelic Experience1)

# Column 63:AE2(Autotelic Experience2)

# Column 64:AE3(Autotelic Experience3)

# Column 65:AE4(Autotelic Experience4)

# Column 66:CR1(Creativity1)

# Column 67:CR2(Creativity2)

# Column 68:CR3(Creativity3)

# Column 69:CR4(Creativity4)

# Column 70:CR5(Creativity5)

# Column 71:CR6(Creativity6)

# Column 72:CR7(Creativity7)

# Column 73:CR8(Creativity8)

# Column 74:CR9(Creativity9)

# Column 75:SMU1(Social Media Usage1)

# Column 76:SMU2(Social Media Usage2)

# Column 77:SMU3(Social Media Usage3)

# Column 78:SMU4(Social Media Usage4)

# Column 79:SMU5(Social Media Usage5)

# Column 80:Gender

# Column 81:Age

# Column 82:Seniority

# Column 83:Monthly

# Column 84: JE(Joyous Exploration) average score

# Column 85: DS(Deprivation Sensitivity) average score

# Column 86: SC(Social Curiosity) average score

# Column 87: TS(Thrill Seeking) average score

# Column 88: EC(Enthusiastic Commitment) average score

# Column 89: CC(Constrained Commitment) average score

# Column 90: SPE(Sport Enjoyment) average score

# Column 91: KC(Knowledge Collecting) average score

# Column 92: KD(Knowledge Donating) average score

# Column 93: UF(Unambiguous Feedback) average score

# Column 94: CG(Clear Goals) average score

# Column 95: COTAH(Concentration on Task at Hand) average score

# Column 96: TOT(Transformation of Time)average score

# Column 97: AE(Autotelic Experience)average score

# Column 98: CR(Creativity)average score

# Column 99: SMU(Social Media Usage)average score
